# The plasma membrane as a competitive inhibitor and positive allosteric modulator of KRas4B signaling

*C. Neale, A.E. García*

**Running title:** Membrane regulation of K-Ras4B

## Abstract

Mutant Ras proteins are important drivers of human cancers, yet no approved drugs act directly on this difficult target. Over the last decade, the idea has emerged that oncogenic signaling can be diminished by molecules that drive Ras into orientations in which effector binding interfaces are occluded by the cell membrane. To support this approach to drug discovery, we characterize the orientational preferences of membrane-bound K-Ras4B in 1.45 milliseconds aggregate time of atomistic molecular dynamics simulations. Individual simulations probe active or inactive states of Ras on membranes with or without anionic lipids. We find that the membrane orientation of Ras is relatively insensitive to its bound guanine nucleotide and activation state but depends strongly on interactions with anionic phosphatidylserine lipids. These lipids slow Ras' translational and orientational diffusion and promote a discrete population in which small changes in orientation control Ras' competence to bind multiple regulator and effector proteins. Our results suggest that compound-directed conversion of constitutively active mutant Ras into functionally inactive forms may be accessible via subtle perturbations of Ras' orientational preferences at the membrane surface.

## Statement of Significance

Mutations that lock Ras proteins in active states can undermine cellular decision making and drive cancer. Because there are no drugs to deactivate Ras, we use simulations to relate Ras' three-dimensional orientation at the membrane surface to its signaling competence. Data shows that Ras reorientation is generally rapid, but can be trapped in one of three states by membrane adhesion of the globular signaling domain. One of these states is stabilized by negatively charged lipids and brings an effector binding interface toward the membrane surface, potentially obstructing protein-protein interactions required for propagation of the growth signal. Rare events drive a second type of membrane-based signaling obstruction that correlate with configurational changes in Ras' globular domain, yielding a potential drug target.

# Introduction

Ras proteins are intracellular signal transducers (1) that undergo regulated transitions between active and inactive states based on the identity of a bound guanine nucleotide (2). Whereas guanosine diphosphate (GDP) stabilizes inactive conformations, guanosine triphosphate (GTP) promotes active configurations that can bind downstream effectors (3).

Healthful signaling through Ras depends on its balanced response to upstream regulatory signals. Activation of Ras is accomplished by guanine nucleotide exchange factor proteins (GEFs) that accelerate nucleotide release to facilitate subsequent GTP binding (4, 5). The reverse process of deactivation occurs via enzymatic cleavage of GTP's terminal phosphate group, which is dramatically accelerated upon binding to GTPase activating proteins (GAPs) (6, 7). However, oncogenic mutations in Ras proteins reduce the rate of GAP-stimulated deactivation (6, 8), leading to abnormally large populations of active Ras. Because Ras acts within signaling cascades that control cellular growth and survival (9-14), these overactive mutant Ras proteins are common drivers of human cancers (15-18).

The activation state of Ras is defined in part by the arrangement of a ~10 residue component of Ras' effector-binding interface called switch 1 (3, 19-21). Crystal structures of Ras bound to nonhydrolyzable GTP analogs reveal that the active state involves close association of switch 1 with other parts of Ras' globular G domain (22, 23), including interactions between switch 1 residue T35 and G domain-bound GTP/Mg<sup>2+</sup> (2). When Ras is bound to GTP or an analog, <sup>31</sup>P NMR experiments resolve two interconverting conformational ensembles called states 1 and 2 (24-27). These states likely represent inactive and active Ras, respectively, because state 1 is stabilized upon binding to the catalytic site of a GEF (28) and state 2 is stabilized by effector binding (24-28). Deactivation of Ras involves disordering of switch 1, which has been characterized for wild-type Ras bound to GDP (29) and an inactive T35S mutant bound to a GTP analog (30, 31). Inactive nucleotide-free Ras bound to the GEF SOS1 crystallizes with switch 1 splayed more than 1 nm away from the nucleotide binding site (32).

Ras signals at the plasma membrane, to which it is localized by a C-terminal extension called the highly-variable region or HVR (33, 34). This localization adds an additional layer of

complexity to the instantaneous definition of activity for a given molecule of Ras. Specifically, it is possible for Ras to bind GTP, adopt active structures, and yet be oriented such that the membrane occludes interactions with other proteins and signaling is temporarily obstructed. There is substantial evidence that Ras proteins adopt particular sets of orientations at membrane surfaces (35-41). These orientational preferences are modulated by lipid composition (37) and the identity of the bound nucleotide (35, 42-45), with clear functional relevance (42, 45-47). Indeed, a small molecule has recently been shown to stabilize Ras orientations that are incompetent to bind Raf kinase, an important downstream effector (48). However, the molecular mechanisms by which Ras' bound nucleotide and/or activation state influence membrane interactions remain elusive.

Here, we report atomistic molecular dynamics (MD) simulations of full-length, post-translationally processed K-Ras4B (hereafter Ras) tethered to a lipid bilayer by its farnesylated HVR. We use hundreds of 5  $\mu$ s simulations totaling 1.45 ms to characterize the influence of nucleotide identity, activation state, and lipid composition on the dynamic orientation of Ras and its interactions with membrane surfaces. Multiple simulations are needed to obtain statistically significant orientational distributions. We use the resulting orientational maps to assess the activity of the cell membrane as a competitive inhibitor or a positive allosteric modulator that reversibly blocks protein complexation or preconditions Ras for binding to other signaling proteins, respectively.

This research is part of a collaboration between the U.S. Department of Energy and National Cancer Institute to accelerate the development of novel diagnostics and targeted therapies for Ras-driven cancer initiation and growth.

## Methods

Simulation systems consist of a hydrated lipid bilayer with a single molecule of full length K-Ras4B tethered to one of the bilayer leaflets via its farnesylated HVR. The nucleotide binding pocket contains a magnesium ion and either GDP or GTP, with switch 1 initially in inactive or active configurations, respectively. N-terminal residue M1 has a backbone  $\text{NH}_3^+$ . C-terminal residue C185 is backbone-methylated and side chain-farnesylated. Lipid bilayers are composed of either pure 1-palmitoyl-2-oleoyl-*sn*-glycero-3-phosphocholine (POPC) or a 7:3 ratio of POPC and 1-palmitoyl-2-oleoyl-*sn*-glycero-3-phospho-L-serine (POPS). Simulation systems have 200 lipids per bilayer leaflet, 150 mM excess KCl, and  $\sim 115$  water molecules per lipid, consistent with a fully hydrated lipid bilayer (49). The G domain and HVR comprise residues M1-H166 and K167-C185, respectively.

**Simulation Parameters.** Simulations are conducted with mixed-precision (SPFP (50)) AMBER 16 software (51). Protein and lipids are modeled by the CHARMM36 force field with CMAP (52, 53). All histidines are the neutral tautomer with a proton on the epsilon nitrogen. C-terminal methylation parameters are from the CHARMM CT1 patch. C-terminal farnesyl parameters are from Neale and García (54). Guanine nucleotide parameters are based on guanosine monophosphate and pyrophosphate parameters developed for use with CHARMM36 nucleic acids (55). Magnesium parameters are those introduced for use with CHARMM27 nucleic acids (56). The water model is TIP3P (57) with CHARMM modifications (58). AMBER formatted topologies are obtained with the gromber tool of ParmEd from AmberTools 16 after initial topology construction with GROMACS 5.1.2 (59). Water molecules are rigidified with SETTLE (60) and other covalent bond lengths involving hydrogen are constrained with SHAKE (61) (tolerance= $10^{-6}$  nm). Lennard-Jones (LJ) interactions are evaluated using an atom-based cutoff with forces switched smoothly to zero between 1.0 and 1.2 nm. This is the recommended LJ cutoff for the CHARMM36 protein force field (52, 62). Note that the CHARMM36 lipid force field was parameterized with LJ switching between 0.8 and 1.2 nm (53). Coulomb interactions are calculated using the smooth particle-mesh Ewald method (63, 64) with Fourier grid spacing of 0.08 to 0.10 nm and fourth order interpolation. Simulation in the  $NpT$  ensemble is achieved by semi-isotropic coupling to Monte Carlo barostats (51) at 1.01325

bar with compressibilities of  $4.5 \times 10^{-5} \text{ bar}^{-1}$ ; temperature-coupling is achieved using velocity Langevin dynamics (65) at 310 K with a coupling constant of 1 ps. The integration time step is 4 fs, which is enabled by hydrogen mass repartitioning (66). Non-bonded neighbor-lists are built to 1.4 nm and updated heuristically (51).

**Simulation set.** We conduct a total of 290 5- $\mu\text{s}$  simulations. As outlined in Table 1, 200 of these simulations contain inactive, GDP-bound Ras, of which 116 use a POPC bilayer and 84 use a mixed 7:3 POPC:POPS bilayer. The other 90 simulations contain initially active, GTP-bound Ras on a mixed 7:3 POPC:POPS bilayer. We do not simulate active, GTP-bound Ras with pure POPC bilayers.

**Table 1:** Simulation systems.

| system                | bilayer       | nucleotide | $N$ simulations | duration ( $\mu\text{s}$ ) |       |
|-----------------------|---------------|------------|-----------------|----------------------------|-------|
|                       |               |            |                 | each                       | total |
| purePC <sup>GDP</sup> | POPC          | GDP        | 116             | 5                          | 580   |
| PC:PS <sup>GDP</sup>  | 7:3 POPC:POPS | GDP        | 84              | 5                          | 420   |
| PC:PS <sup>GTP</sup>  | 7:3 POPC:POPS | GTP        | 90              | 5                          | 450   |

Systems with  $195,000 \pm 5,000$  atoms are constructed by adding G domains to an equilibrated ensemble of HVR configurations drawn from our previous work (54). Simulations of GDP- and GTP-bound Ras are based on 4OBE (67) and 5USJ (68) structures, respectively. Details of system construction are provided in SI Methods.

**Order parameters.** G domain orientation is defined by tilt and rotation angles (69) with respect to a reference orientation in which helix 5 ( $\alpha_5$ ; V152-K165) from chain A of PDB 4OBE (67) is aligned with the global bilayer normal (Cartesian  $\mathbf{z}$  axis). This reference orientation is compared to each sampled orientation to compute its tilt away from  $\mathbf{z}$  and the azimuthal angle of that tilt (i.e., the rotation angle) using the rotation matrix that minimizes the root mean squared deviation between  $C_\alpha$  atoms of G domain residues T2-N26, Y40-L56, and D69-H166. Tilting toward the center of mass of the  $C_\alpha$  atoms of  $\alpha_2$  (S65-T74) is defined as rotation=0°. Viewing the reference orientation from N-terminal to C-terminal end of  $\alpha_5$  (i.e., toward the membrane plane), positive and negative rotations involve tilting toward G domain regions counter-clockwise and clockwise from  $\alpha_2$ , respectively.

**Analysis.** Time averaged data are computed from the 2-5  $\mu\text{s}$  trajectory segment (the last 3  $\mu\text{s}$ ) in each simulation. Orientational “fold enrichment” is obtained by dividing the probability at which each histogram bin is sampled by the per-bin probability expected from a homogeneous distribution over  $180^\circ$  of tilt and  $360^\circ$  of rotation with bin widths of  $3^\circ$  and  $6^\circ$ , respectively. This approach corrects for variable histogram bin size as a function of tilt angle without introducing a less intuitive order parameter such as  $\cos(\textit{tilt})$ . Orientations of published structures are computed from raw coordinates, except models from PDBs 6CCH, 6CC9, and 6CCX (48), which are first aligned to the nanodisk belt proteins in model 1 from PDB 2MSC (44) so as to position the bilayer normal along the Cartesian  $\mathbf{z}$  axis. Rotation angles for 2MSC are shifted by  $-12^\circ$  to account for the  $\alpha 2$  offset in model base PDB 4LPK (70) chain B vs. our reference structure (4OBE (67) chain A). Molar entropies of Ras G domain orientation are computed as  $S^\circ = -k_B \times \sum P_{\textit{tilt,rot}} \times \ln(P_{\textit{tilt,rot}})$  for Boltzmann constant  $k_B$  and non-zero orientational probabilities  $P_{\textit{tilt,rot}}$ . To reduce noise in projections of orthogonal data onto maps of tilt and rotation, average values are only displayed for orientational bins that are sampled at least 5 times in both simulation subsets A and B (except the quantification of G domain capability to bind regulators and effectors, which shows all data). Our measure of membrane obstruction,  $N_{\textit{clash}}$ , is averaged over all trajectory frames from 2-5  $\mu\text{s}$  in all 290 simulations after reorienting crystal structures to minimize the mean squared displacement of  $C_\alpha$  atoms in G domain residues T2-N26, Y40-L56, and D69-H166 between simulated K-Ras4B and crystallographic H-Ras. Note that K-Ras and H-Ras G domains share a common fold (23) and have a gap-less sequence alignment with matching identity for 156/166 residues (71). Secondary structure is computed with DSSP version 2.0.4 (72).

Lateral diffusion coefficients are computed by fitting average intra-simulation Cartesian  $\mathbf{x}, \mathbf{y}$  plane mean squared displacements of the centers of mass of lipids or the Ras G domain to linear functions over  $\Delta t = 1-2 \mu\text{s}$  and dividing the fitted slope by 4. Simulation trajectories are processed to remove  $\mathbf{x}, \mathbf{y}$  motion of the center of mass of lipids in the bilayer leaflet under consideration prior to evaluating molecular diffusion (73). Diffusion coefficients computed from these simulations are not corrected for finite size effects stemming from hydrodynamic interactions (74-77). Since all systems have similar dimensions, we compare unmodified diffusion coefficients. Orientational displacement,  $\theta$ , is the angle formed between two unit vectors in a

three dimensional polar coordinate system of ( $r=1$ , tilt, rotation); i.e.,  $\theta_{ij}=\cos^{-1}(\mathbf{V}_i\cdot\mathbf{V}_j)$  for vectors  $\mathbf{V}=[\sin(\text{tilt})\times\cos(\text{rot}),\sin(\text{tilt})\times\sin(\text{rot}),\cos(\text{tilt})]$  corresponding to orientations  $i$  and  $j$ . Survival probabilities,  $S(\Delta t)$ , are fit to  $2^{-\Delta t/\tau}$ , and the mean half life is reported as  $\tau$ .

To estimate precision, simulations are divided into two sets and average values are computed for each set independently. Specifically, for  $N$  simulations of a given system composition, sets A and B comprise 2-5  $\mu\text{s}$  trajectory segments from simulations  $[1,N/2]$  and  $[N/2+1,N]$ , respectively. The standard deviation of the mean is calculated as  $\sigma_M = \sqrt{(\mu_A - \mu)^2 + (\mu_B - \mu)^2}$ , for subset mean values  $\mu_A$  and  $\mu_B$ , and overall mean value  $\mu$ . Block-averaging (78) represents ensemble average values from time  $t$  to  $t + \Delta t$ .



## Results and Discussion

To study the influence of membrane composition on protein behavior, we simulate GDP-bound Ras with lipid bilayers composed of either POPC (purePC<sup>GDP</sup> systems) or a 7:3 mixture of POPC:POPS (PC:PS<sup>GDP</sup> systems). Nucleotide-dependent behavior is probed via comparison to simulations of GTP-bound Ras (PC:PS<sup>GTP</sup> systems). A total simulation time of 1.45 ms is achieved in 290 5- $\mu$ s simulations (Table 1). Ensemble averaged time series of Ras G domain center of mass distance from the bilayer and the number and type of G domain-lipid contacts lead us to discard the first two microseconds per simulation, after which ensembles of this size show no statistically significant drift in these metrics with increasing time (Fig. 1 and Table S1).

**Membrane Adhesion and Lateral Diffusion.** Simulations of full-length Ras are largely consistent with our previous HVR-only simulations (54) in which anionic PS lipids attract the HVR, and therefore the G domain, toward the membrane (Figs. 1A-C and S1). In the context of full-length Ras, we find that the identity of the bound nucleotide does not significantly affect Ras' displacement from the bilayer surface (Fig. 1A). In contrast, PS lipids reduce the likelihood of G domain disengagement from the lipid bilayer by a factor of  $8 \pm 1$  (Fig. 1D) and are locally enriched by a factor of  $1.7 \pm 0.1$  (Fig. 1E). Concurrently, PS lipids slow the lateral diffusion of Ras on the membrane surface by a factor of  $2.2 \pm 0.7$  (Table 2).

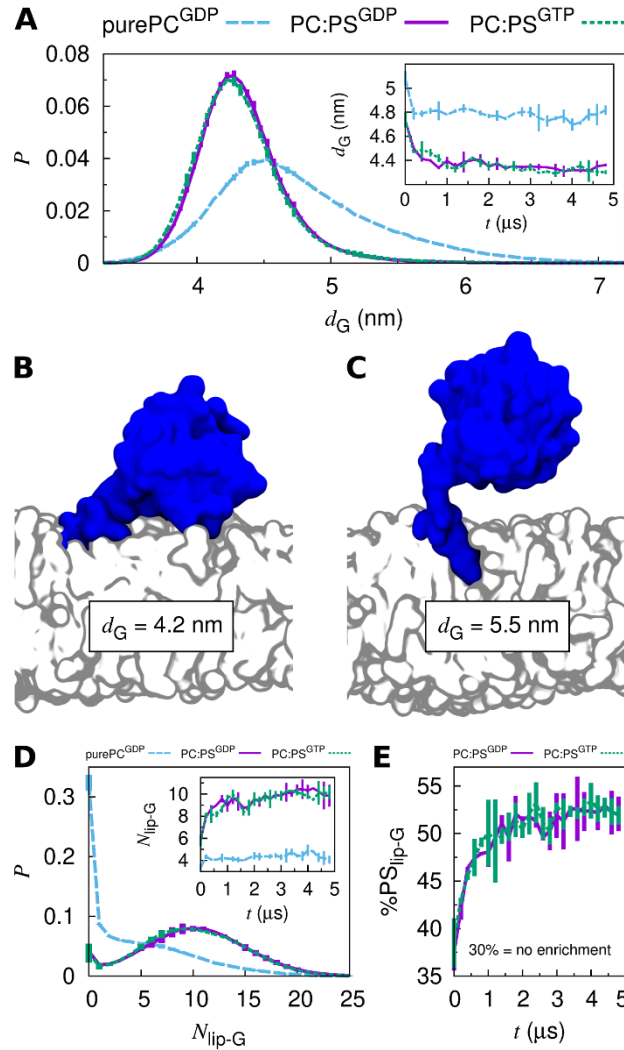

**Figure 1:** Ras G domain-membrane interactions. (A) Histograms of the distance between the centers of mass of the G domain and the bilayer along its normal,  $d_G$ . Curves connect average values and bars show standard deviation of the mean. Inset: ensemble- and block-averaged time series of  $d_G$ . (B and C) Representative configurations for (B)  $d_G=4.2$  nm and (C)  $d_G=5.5$  nm. (D) Histograms of the number of lipids contacting the G domain,  $N_{lip-G}$  (0.6 nm heavy atom cutoff). Inset: ensemble- and block-averaged time series of  $N_{lip-G}$ . (E) Ensemble- and block-averaged time series of the percentage of all lipids contacting the G domain that are PS lipids,  $\%PS_{lip-G}$ .

**Table 2:** Lateral diffusion constants<sup>a</sup>,  $D$ .

| Species | Context               | +Ras <sup>b</sup> | $D$ ( $\mu\text{m}^2/\text{s}$ ) |
|---------|-----------------------|-------------------|----------------------------------|
| POPC    | purePC <sup>GDP</sup> | no                | $8.9 \pm 0.1$                    |
|         |                       | yes               | $8.6 \pm 0.1$                    |
|         | PC:PS <sup>c</sup>    | no                | $7.6 \pm 0.2$                    |
|         |                       | yes               | $6.8 \pm 0.1$                    |
| POPS    | PC:PS                 | no                | $6.9 \pm 0.1$                    |
|         |                       | yes               | $6.0 \pm 0.2$                    |
| Ras     | purePC <sup>GDP</sup> | yes               | $4.7 \pm 0.3$                    |
|         |                       | yes               | $2.1 \pm 0.7$                    |
|         | PC:PS <sup>GDP</sup>  | yes               | $2.3 \pm 0.8$                    |
|         |                       | yes               | $1.9 \pm 0.6$                    |

<sup>a</sup>Mean square displacements are shown in Fig. S2.

<sup>b</sup>Values of  $D$  for lipids in the absence of Ras are obtained from the distal bilayer leaflet.

<sup>c</sup>Unless specified, PC:PS data is aggregated over PC:PS<sup>GDP</sup> and PC:PS<sup>GTP</sup>.

The lateral diffusion constant we compute for Ras on 30% POPS bilayers ( $2.1 \pm 0.7 \mu\text{m}^2/\text{s}$ ; Table 2) is slower than experimental rates from fluorescence correlation spectroscopy ( $\sim 4.5 \mu\text{m}^2/\text{s}$ ) and single particle tracking ( $\sim 3.5 \mu\text{m}^2/\text{s}$ ) in supported bilayers containing 20% 1,2-dioleoyl-*sn*-glycero-3-phospho-L-serine (DOPS) (79). This discrepancy may relate to our larger concentration of PS lipids, the minor population of slower diffusing ( $\sim 1 \mu\text{m}^2/\text{s}$ ) monomeric Ras identified by single particle tracking (79), or finite size effects in our simulations (see Methods). Nevertheless, simulation (Table 2) and experiment (79) agree that diffusion rates are nucleotide-independent.

**Orientation with Respect to the Bilayer Surface.** We characterize the disposition of Ras' G domain with respect to the bilayer surface using tilt and rotation angles (69). Briefly, the tilt angle describes the deflection of helix 5 ( $\alpha 5$ ) from the bilayer normal, and the rotation angle describes the direction of the tilt (see Methods). Schematics identifying the regions of Ras that are brought into membrane contact upon tilting with different rotations are shown in Figs. 2A and 2B.

G domain orientations sampled in our simulations are shown in Figs. 2D-F. By comparing simulations with and without 30% PS lipids, we are able to characterize the lipid dependence of Ras orientation. Pure PC bilayers tend to engage with Ras' helical  $\alpha 4/\alpha 5$  or  $\alpha 3/\alpha 4$  interfaces, and to a lesser extent with beta strands 1-3 and  $\alpha 2$  ( $\beta 1/2/3$  for brevity) or switch 2 (Fig. 2D), the later

plunging into the bilayer upon  $75^\circ$  tilting with a rotation angle near  $165^\circ$  (Fig. 2H). The addition of PS lipids further reduces the G domain's orientational molar entropy,  $S^\circ$ , which is  $62.6 \pm 0.1$  J/mol/K for purePC<sup>GDP</sup> systems vs.  $58.1 \pm 0.1$  J/mol/K for PC:PS systems (computed from raw probabilities underlying Figs. 2D-F). This orientational restriction is consistent with the increase in G domain-lipid interactions upon addition of PS lipids (Fig. 1). In addition to favoring orientations in which Ras'  $\alpha 4/\alpha 5$  or  $\alpha 3/\alpha 4$  interfaces interact with the membrane (Figs. 2E, F, I, J), these anionic lipids also direct Ras toward rotation angles near  $105^\circ$ , where tilting drives  $\alpha 2$  and  $\beta 1/2/3$  toward the membrane (Figs. 2E, F, K). Although Ras tilts more extensively toward  $\alpha 4/\alpha 5$  when bound to GTP compared to GDP (Figs. 2E, F, G), nucleotide-dependent differences in Ras orientation are of the same magnitude as statistical sampling errors (Fig. S3 and Table S2). Therefore, if Ras' disposition does depend on the identity of the bound nucleotide, it cannot be determined from this extensive set of simulations.

Paramagnetic NMR in nanodisks with 20% PS lipids reveals the same three main states in which K-Ras4B tilting brings either  $\alpha 4/\alpha 5$ ,  $\alpha 3/\alpha 4$ , or  $\beta 1/2/3$  into membrane contact (Fig. 2C) (44, 48). These states are also captured in published MD simulations (36, 41, 80), although the  $\alpha 4/\alpha 5$  and  $\alpha 3/\alpha 4$  states are not well resolved by alternative order parameters (Fig. S5). Together, these experimental and theoretical results indicate that Ras' G domain favors distinct orientations at the membrane surface and that PS lipids modulates orientational preferences in a manner that may be druggable (48).

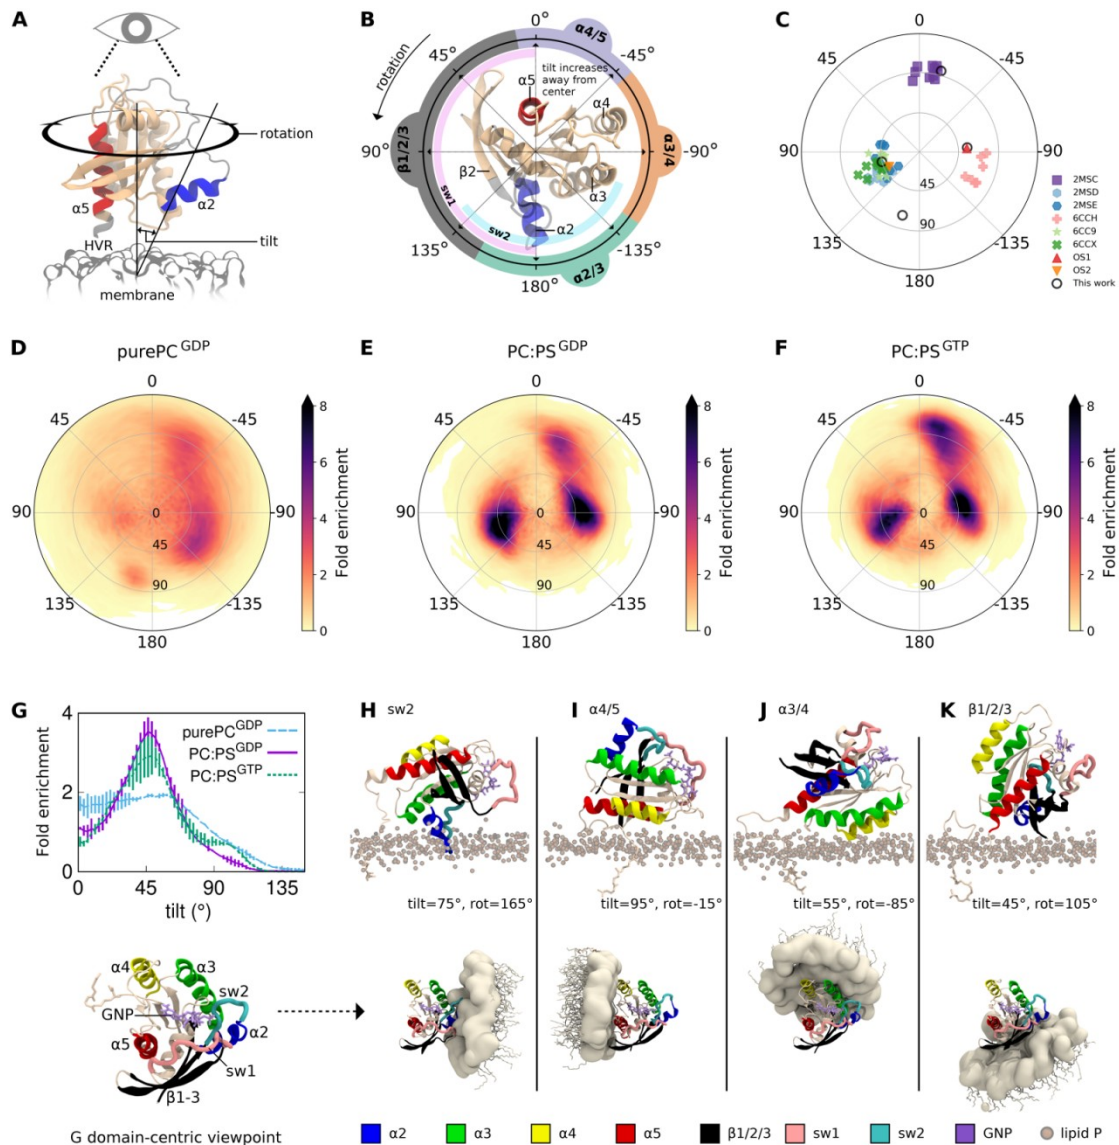

**Figure 2:** Orientations of the Ras G domain. (A) Reference orientation. (B) Rotation angles and corresponding elements of Ras brought into membrane contact upon tilting are inscribed around the reference orientation, viewed toward the bilayer along its normal. (C) Published orientations of membrane-bound K-Ras4B: PDBs 2MSC, 2MSD, and 2MSE are the “exposed”, “occluded”, and “semi-occluded” orientations from Mazhab-Jafari et al. (2MSE includes a bound Raf domain) (44); PDBs 6CCH, 6CC9, and 6CCX are the “E3”, “O1”, and “O2” orientations from Fang et al. (48); “OS1” and “OS2” are from Prakash et al. (36). (D-F) Heat maps of the fold enrichment over random for tilt and rotation angles sampled in this work. Statistical error is quantified in Fig. S3 and Table S2. Orientational definitions by alternative order parameters (36, 80) are provided in Figs. S4 and S5. (G) Fold enrichment of tilt angle. (H-K) Representative orientations that bring (H) switch 2, (I)  $\alpha 4/5$ , (J)  $\alpha 3/4$ , and (K)  $\beta 1/2/3$  into membrane contact, shown (above) with respect to the membrane plane and (below) in a G domain-centric frame of reference.

**Interactions with Lipids.** All four population basins identified above involve G domain interaction with a greater than average number of lipids (Figs. 3A, B). In the PC:PS context,  $\alpha 4/5$  orientations show close interactions between lipids and  $\alpha 4$  residues K128 and R135 and, to a lesser extent,  $\alpha 5$  residue R161 (Fig. 3C).  $\alpha 3/4$  orientations also involve close lipid association with  $\alpha 4$  residues K128 and R135, in addition to  $\alpha 3$  residues R97, K101, and R102 (Fig. 3D). Finally,  $\beta 1/2/3$  orientations have close associations for  $\beta 1$  residues M1, E3, and K5,  $\beta 2$  residue R41, and  $\alpha 2$  residue R73 (Fig. 3E). Lipid contacts observed in the  $\alpha 3/4$  and  $\beta 1/2/3$  states are consistent with those previously identified via simulation (36). In the pure PC context, orientations with switch 2 membrane insertion show tight lipid interactions for switch 2 residues Y64, S65, R68, Y71, and R73 with less frequent interactions for  $\alpha 3$  residue R102 (Fig. 3F).

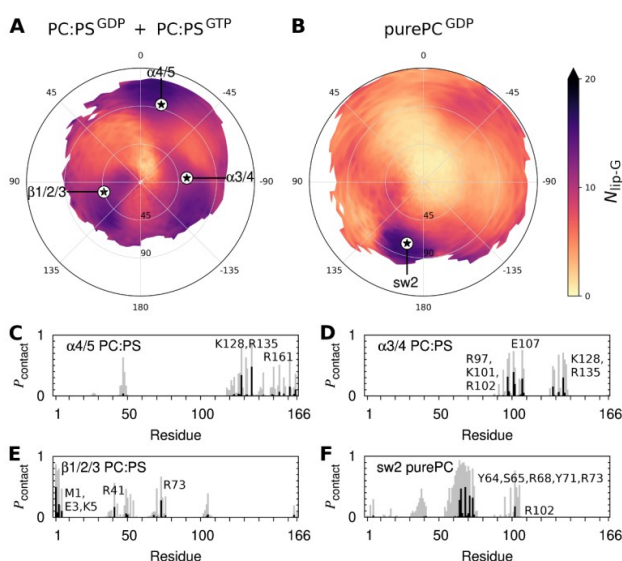

**Figure 3:** Orientational dependence of Ras G domain-membrane interactions. (A and B) Time and ensemble averaged values of the number of lipids contacting the G domain,  $N_{lip-G}$ , for G domain orientations in simulations with (A) PC:PS and (B) PC lipids. Stars denote orientations shown in Figs. 2H-K, which are representative of the major populations evident in Figs. 2D-F. (C-F) Histograms showing the probability at which each G domain residue contacts a lipid in each of four different Ras orientations. Contacts are shown for heavy atoms closer than (gray) 0.6 nm and (black) 0.28 nm. Simulation snapshots are considered only when Ras' tilt and rotation angles are each within  $5^\circ$  of the noted population peaks.

The imperfect alignment of highly populated orientations (Figs. 2D-F) with those that maximize the number of lipids contacting the G domain (Figs. 3A, B) is likely a geometrical consequence of HVR attachment to the C-terminal end of  $\alpha 5$ . By definition, this end of  $\alpha 5$  points toward the membrane at tilt=0° and tilting correlates with membrane separation of C-terminal G domain residue H166, except when Ras tilts toward  $\alpha 4/5$  (Fig. S6). Therefore, favored orientations of the G domain appear to be primarily driven by direct interactions with the membrane but are subject to constraints on tilting enforced by the HVR's preference to associate with anionic lipids. Additional factors such as HVR-lipid contacts (Fig. S7C) and HVR-G domain contacts (Fig. S7F) exhibit weaker correlations with highly populated orientations and may play minor roles in regulating G domain disposition.

The closer association of the G domain with the membrane in major population basins is also resolved by center of mass separation (Fig. S7A). Nevertheless, in the presence of PS lipids, the average minimum G domain-membrane separation is largely constant, suggesting that the G domain can remain in membrane contact as it rolls between  $\alpha 4/\alpha 5$  and  $\alpha 3/\alpha 4$ , and between  $\alpha 3/\alpha 4$  and  $\beta 1/2/3$  (Fig. S7B). In contrast, direct transitions between  $\alpha 4/\alpha 5$  and  $\beta 1/2/3$  are more likely to involve transient disengagement of the G domain from the membrane (Fig. S7B). This feature may result from unfavorable interactions between lipids and the anionic  $\beta 1/ \beta 2$  loop (which contains D47 and E49), its convex shape (Fig. 2B), or strong dependence of  $\alpha 4/\alpha 5$  membrane adhesion on  $\alpha 4$  residues K128 and R135 (Fig. 3C), which must release the membrane during a rolling motion toward  $\beta 1/2/3$ .

**Contact with the HVR.** In contrast to the above mentioned relationships between orientational probability and G domain-membrane interactions, there are no obvious correlations with the number of lipids contacting the HVR (Fig. S7C) or anionic proportion among lipids in contact with the G domain (Fig. S7D) or the HVR (Fig. S7E). Although the number of HVR residues contacting the G domain is elevated in orientations near the  $\alpha 4/5$  and  $\alpha 3/4$  states (Fig. S7F), G domain-HVR interactions are reasonably well predicted by models in which contact probabilities fall off linearly with increasing HVR residue number and, within the G domain, based on rigid-body distance from the HVR attachment point at H166 (Fig. S8). Therefore, our simulations of farnesylated, membrane bound Ras are not consistent with a unique, high affinity HVR binding

site on the G domain, as has been proposed for autoinhibition of GDP-bound K-Ras4B in the absence of a membrane (81, 82).

**Length of G domain Helix 5.** Circular dichroism spectra of K-Ras4B HVR peptides associated with anionic membranes are consistent with structural disorder (83), as are our previous simulations (54). Nevertheless, some crystal structures resolve  $\alpha 5$  helical extension to HVR residue K172 (84) or D173 (85) and there is extensive helical content in the HVR of full-length K-Ras4B in complex with PDE $\delta$  (86). It is therefore an open question whether the G domain nucleates helical extension into the HVR, especially since nearly all crystal structures of K-Ras4B are based on truncated sequences containing only the G domain. Irrespective of nucleotide identity or the presence PS lipids, our simulations reveal that  $\alpha 5$  loses 50% of its helicity at residue K167, with extension to K169 or S171 in  $16 \pm 2\%$  and  $5 \pm 1\%$  of the population, respectively (Fig. 4A). Although there is no simple relation between  $\alpha 5$  length and G domain orientation in simulations with PC:PS lipids (Fig. 4B), switch 2 embedding in pure PC bilayers appears to correlate with C-terminal extension of  $\alpha 5$  (Fig. 4C-E). Nevertheless, only 3 of 116 purePC<sup>GDP</sup> simulations exhibited switch 2 embedding for more than 1  $\mu$ s and therefore this state has less statistical significance than others.



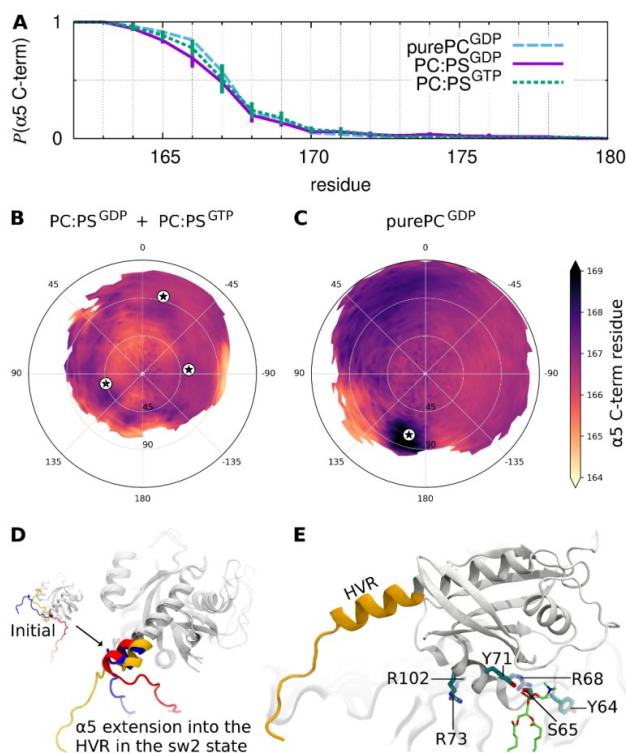

**Figure 4:** Length of the HVR-proximal G domain helix,  $\alpha 5$ . (A) Probability at which  $\alpha 5$  extends to the noted residue. (B and C) Time- and ensemble-averaged values of the C-terminal residue in  $\alpha 5$  as a function of G domain orientation. (D) Overlaid snapshots of three simulations in which  $\alpha 5$  initially terminated at or near H166 and later adopted two additional helical turns into the HVR with concurrent membrane-embedding of switch 2. (E) Representative configuration with membrane-embedded switch 2, highlighting lipid interaction with S65 and Y71.

**Membrane Insertion of HVR residue M170.** In our previous simulation study of isolated HVR peptides, we proposed a fly-casting mechanism by which the HVR's poly-lysine stretch (K<sub>175</sub>KKKKK<sub>180</sub>) attaches to anionic lipids whereas HVR residue M170 seeks out membrane defects (54). Consistent with those results, the present simulations show that spontaneous membrane insertion of M170 is possible in the context of full-length K-Ras4B (Fig. 5). This interaction is more common in the presence of anionic PS lipids and is nearly exclusive to G domain orientations that are similar to the highly populated  $\beta 1/2/3$  state, excepting a reduction in the tilt angle (Figs. 5A, B). In our set of 174 PC:PS simulations, 12 exhibited spontaneous M170 insertion that lasted for more than 1  $\mu$ s. Nevertheless, the presence of the G domain reduces the likelihood of M170 membrane insertion, which is  $\sim 25\%$  for HVR peptides (54) and only  $4 \pm 2\%$

in the context of full-length Ras. This attenuation likely arises from spatial constraints given that, in the presence of PS lipids, the G domain forces this region of the HVR an average of  $\sim 0.5$  nm farther from the membrane surface, whereas the disposition of other regions of the HVR are relatively unaffected (Fig. S1).

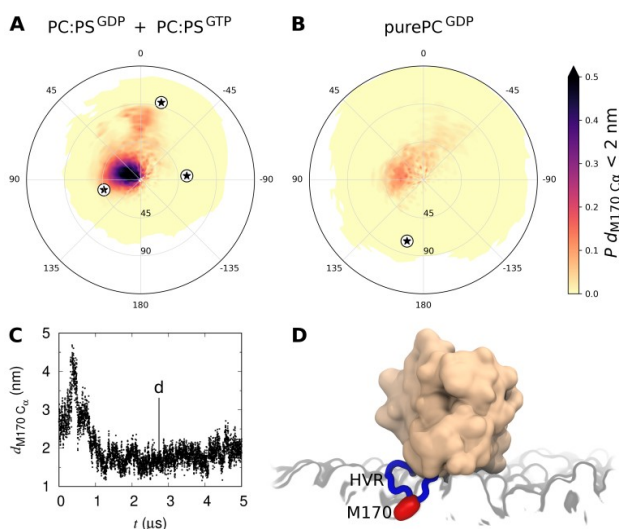

**Figure 5:** Membrane insertion of HVR residue M170. (A and B) Probability of the M170 C $\alpha$  atom being closer than 2.0 nm to the bilayer center along its normal. (C) M170 C $\alpha$  distance from the bilayer center in a representative PC:PS simulation in which M170 undergoes spontaneous membrane insertion. (D) Snapshot from the trajectory shown in part C.

**G Domain Reorientation.** In addition to modulating orientational preferences and slowing lateral diffusion, anionic PS lipids slow the G domain's orientational diffusion by an order of magnitude (Fig. 6A). As was the case for lateral diffusion, rates of orientational diffusion do not depend on nucleotide identity (Fig. 6A). Comparison to average orientational displacement between two randomly selected snapshots from the same simulation set shows that this effect is kinetic (Fig. 6B) and does not simply arise from the time and ensemble averaged orientational limitations imposed by PS lipids (Fig. 2). Importantly, time-dependent orientational displacement is smaller and does not depend on lipid composition when evaluation is restricted to trajectory segments in which the G domain maintains at least one lipid contact (heavy atom distance  $< 0.28$  nm; Fig. 6C). In fact, average orientational displacements between times  $t$  and

$t+0.5 \mu\text{s}$  depend linearly on the largest G domain-lipid separation distance encountered (Fig. 6D). Transient excursions of the G domain away from the bilayer surface are more common in the absence of PS lipids (Figs. 1A, 1D, and S9), except when switch 2 is embedded in the bilayer (Fig. 6E). Similarly, the  $\alpha 4/\alpha 5$ ,  $\alpha 3/\alpha 4$ , and  $\beta 1/2/3$  states change orientation more slowly than intervening orientations in the presence of PS lipids (Figs. 6F, G). Together, these results suggest that a major component of G domain reorientation occurs during its transient disengagement from the membrane, after which reassociation is enforced by the still-tethered HVR.

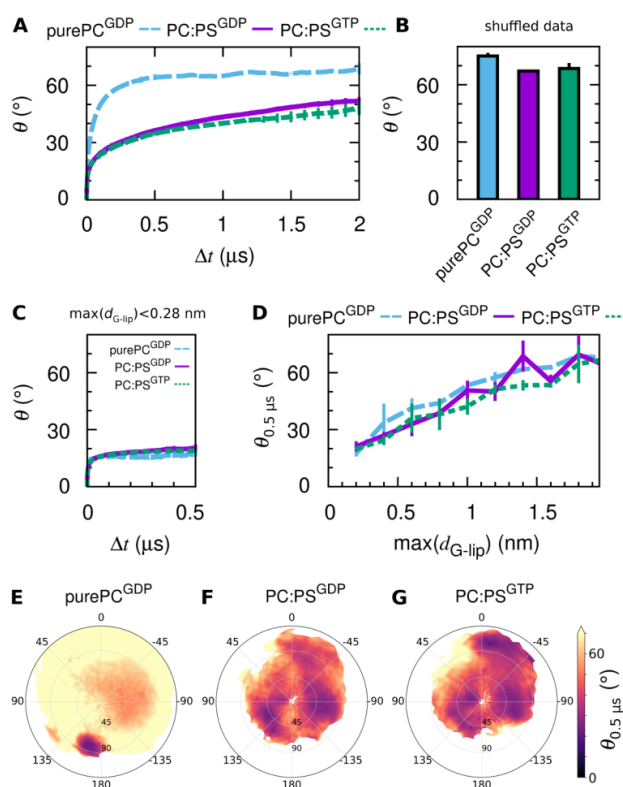

**Figure 6:** Orientational diffusion of the Ras G domain. (A) Average orientational displacement,  $\theta$ , between configurations at times  $t$  and  $t+\Delta t$ . (B) Average value of  $\theta$  from time- and simulation-shuffled data. (C)  $\theta$  vs.  $\Delta t$  for trajectory segments in which the G domain maintains lipid contact (minimum G domain-lipid separation,  $d_{G-lip} < 0.28 \text{ nm}$ ). (D) Average values of  $\theta$  at  $\Delta t = 0.5 \mu\text{s}$ ,  $\theta_{0.5 \mu\text{s}}$ , as a function of the maximum value of  $d_{G-lip}$  in that time span. Analogous plots for different time spans are shown in Fig. S10. (E-G)  $\theta_{0.5 \mu\text{s}}$  as a function of G domain orientation at time  $t$ .

**Active State Decay.** Our simulations of GTP- and GDP-bound Ras are designed to probe the influence of activation state on membrane interaction under the assumption that the presence of GTP is sufficient to maintain active Ras configurations. However, out of 90 PC:PS<sup>GTP</sup> simulations, 21 incur spontaneous detachment of switch 1 residue T35 from GTP/Mg<sup>2+</sup> (Figs. 7A, B). This detachment does not conspicuously depend on Ras orientation (Fig. 7C). Survival probabilities indicate a  $11 \pm 2 \mu\text{s}$  half life of the T35-Mg<sup>2+</sup> interaction (Fig. 7D), which is much shorter than the 90  $\mu\text{s}$  half life of active-like configurations of switch 1 at 310 K calculated based on <sup>31</sup>P NMR for H-Ras complexed with the GTP analog Gpp(NH)p (24). Moreover, conformational active-state half lives are an order of magnitude larger for GTP- compared to Gpp(NH)p-bound Ras (27). Therefore, our simulations underestimate the stability of Ras' active configurational ensemble by up to two orders of magnitude. Nevertheless, orientations sampled in these 21 simulations are similar to those in 69 PC:PS<sup>GTP</sup> simulations in which T35 remains coordinated by GTP/Mg<sup>2+</sup>, supporting our conclusion that the membrane orientation of K-Ras4B does not substantially depend on the identity of the bound nucleotide or the arrangement of switch 1 (Figs. 7E, F).

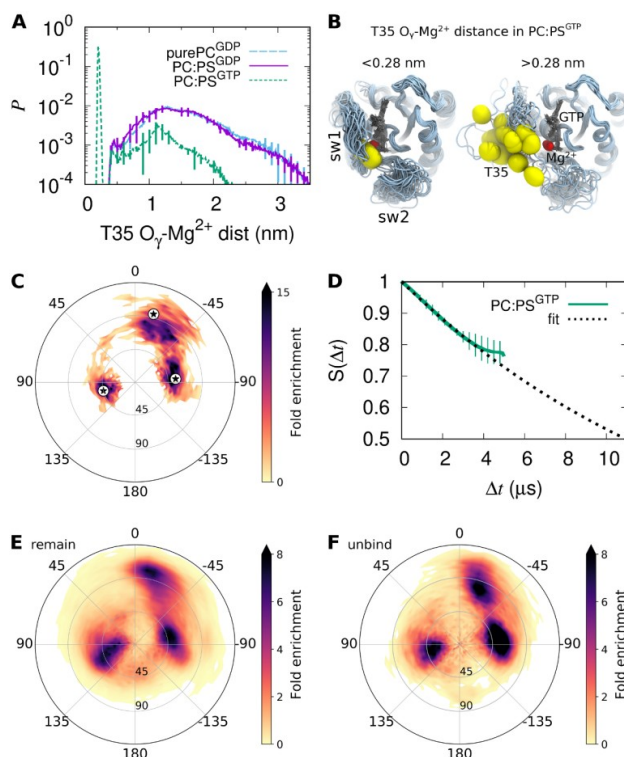

**Figure 7:** Detachment of switch 1 in 21 of 90 PC:PS<sup>GTP</sup> simulations. (A) Probability histograms of the distance between T35 side chain oxygen atom O<sub>γ</sub> and the GTP-coordinated Mg<sup>2+</sup> ion. On the 5 μs/simulation timescale, distances <0.28 nm are maintained in 83±4% of the sampling for PC:PS<sup>GTP</sup> systems. Approaches closer than 0.28 nm are never observed in GDP systems. (B) Overlay of final configurations in (left) 69 simulations with stable T35-Mg<sup>2+</sup> interaction and (right) 21 simulations with T35 unbinding. (C) Orientations sampled within ±100 ns of T35-Mg<sup>2+</sup> unbinding. (D) Survival of the T35-Mg<sup>2+</sup> interaction fit to an exponential decay (0.28 nm interaction cutoff). (E and F) Heat maps of the fold enrichment over random for tilt and rotation angles sampled in PC:PS<sup>GTP</sup> simulations in which the T35 side chain oxygen (E) did not, or (F) did dissociate from the GTP-coordinated Mg<sup>2+</sup> ion.

**Binding to Regulators and Effectors.** Interest in Ras' orientation is largely due to its potential impact on the binding of regulators and effectors. In this context, the lipid bilayer may act as a competitive inhibitor that binds reversibly to Ras interfaces, thereby occluding them. To quantify the orientational dependence of Ras' competence to bind other proteins, we align crystal complexes on Ras G domain configurations from our simulations and assess the spatial overlap between the crystallographic binding partner and the simulated lipid bilayer (Fig. 8). Clearly, none of these binding partners can engage Ras when switch 2 is embedded in the bilayer.

Moreover, P120GAP binding is inconsistent with the majority of  $\alpha 3/\alpha 4$  orientations and the allosteric Ras bound to SOS1 cannot adopt most  $\alpha 4/\alpha 5$  orientations. Despite the appearance that most proteins can bind  $\alpha 3/\alpha 4$ - and  $\alpha 4/\alpha 5$ -oriented Ras, these binding partners are typically much larger than their co-crystallized domain and therefore orientations that are predicted to be inaccessible for binding via this approach generally represent subsets of the true orientational restrictions.

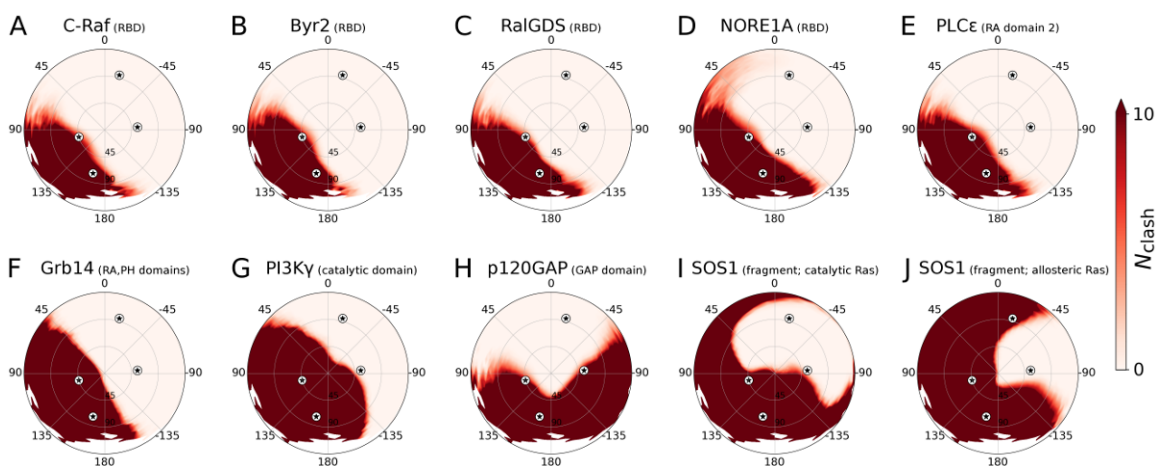

**Figure 8:** Influence of orientation on the G domain's ability to bind regulators and effectors. To evaluate the spatial accessibility of Ras' binding sites for regulators and effectors, crystal structures of H-Ras in complex with another protein are aligned on K-Ras4B G domains from our simulations. Membrane obstruction of this binding is then computed as the number of  $C_{\alpha}$  atoms in the binding partner that are closer than 1.8 nm to the bilayer center,  $N_{\text{clash}}$ , whose average value is plotted as a function of Ras G domain tilt and rotation. PDB structures used in this evaluation are (A) The Ras-binding domain (RBD) of C-Raf (4G0N) (3), (B) the Byr2 RBD (1K8R) (19), (C) the RalGDS RBD (1LFD chains A and B) (20), (D) the NORE1A RBD (3DDC) (21), (E) the PLC $\epsilon$  Ras-associating (RA) domain 2 (2C5L chains A and C) (87), (F) the Grb14 RA and pleckstrin-homology (PH) domains (4K81 chains A and B) (88), (G) the PI3K $\gamma$  catalytic domain (1HE8) (89), (H) the p120GAP GAP domain (1WQ1) (8), and (I and J) a SOS1 fragment (residues 566-1046), containing two Ras binding sites (1NVV) (32). Part (I) shows the ability of SOS1 to bind Ras via its active site and part (J) shows Ras binding to the allosteric site on SOS1. Note that actual values of  $N_{\text{clash}}$  may be larger in cases where the binding protein is only partially represented by the crystal structure. As more details of these co-complexes are resolved, they can be assessed for possible further restriction of accessible binding orientations.

In addition to acting as a competitive inhibitor, the membrane may also act as a positive allosteric modulator by pre-orienting Ras for protein engagement. For example, Mazhab-Jafari et al. have constructed NMR-based models in which Ras adopts  $\beta 1/2/3$  orientations and binds to the Ras binding domain (RBD) of the kinase A-Raf (PDB:2MSE) (44). In these models, cationic side chains of K66, R68, and K69 on the A-Raf RBD are positioned to make favorable interactions with anionic membrane lipids. The potential binding of the B-Raf RBD to a similar  $\beta 1/2/3$  orientation of Ras has also been identified in molecular simulation (69). It is compelling that the modeled demarcation between membrane activity as a competitive inhibitor or a possible allosteric modulator straddles the  $\beta 1/2/3$  basin for many isolated RBDs (Figs. 2E, 2F, and 8). The potentially dramatic functional effects of subtle orientational modulation within the  $\beta 1/2/3$  basin are also apparent in Fig. 2C, where an 8-10° decrease in average tilt and a 6-14° decrease in average rotation convert “occluded” orientations that cannot bind the A-Raf RBD to “semi-exposed” orientations in which this binding is possible and perhaps even favorable (44, 48). The cell membrane’s ability to alternatively obstruct Raf binding to Ras or arrange both proteins for orientationally selected binding is illustrated in Fig. 9.

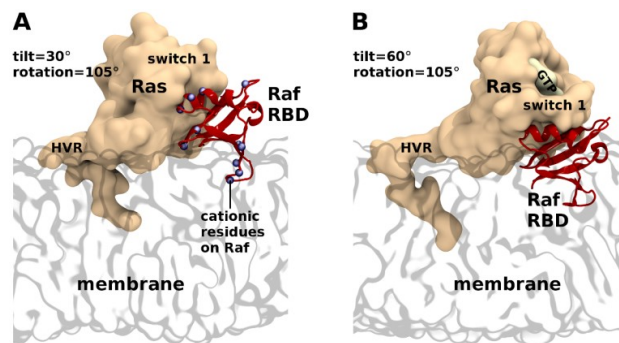

**Figure 9:** Modeled C-Raf RBD bound to simulated Ras in the  $\beta 1/2/3$  state. (A) Ras tilting by 30° permits Raf RBD binding with lipid head group immersion of RBD loop 4, which carries a positive charge in A- and C-RAF and a negative charge in B-RAF (90). (B) Ras tilting by 60° precludes RBD binding. RBD models mimic the 4G0N H-Ras/C-Raf complex (3).

## Conclusions

Extensive simulations reveal the impact of lipid composition and protein activation state on the behavior of full length K-Ras4B. Contact with anionic PS lipids draws Ras' HVR and G domain toward the membrane surface and constricts the sampling of G domain orientations, consistent with previous simulations and data-driven models. In particular, PS lipids increase the population of orientations that bring beta sheets 1-3 and switch 1 toward the membrane surface. This orientational basin straddles a dividing line that separates dispositions of Ras that can bind to a variety of effector proteins from those in which binding is inhibited by the membrane itself. Therefore, existing compounds that stabilize this state (48) may be better able to block Ras signaling if they can be modified to promote slightly more tilting of the G domain toward switch 1. In addition to slowing Ras' translational diffusion by a factor of two, PS lipids slow G domain reorientation by an order of magnitude and we show that the dominant pathway for G domain reorientation involves its transient escape from the membrane surface.

Conversely, this extensive set of GDP- and GTP-bound simulations does not reveal any statistically significant effects of the bound nucleotide on lateral or rotational diffusion, G domain orientation, or protein-lipid interactions. However, the computed half-life of active-state switch 1 configurations is up to two orders of magnitude shorter than observed in experiment, suggesting a problem with parameters or model form (potentially related to the magnesium ion), or that crystal structures identified as state 2 may not in fact represent Ras' fully active configuration.

We also identify a rare event, stabilized by membrane embedding of switch 2, and correlating with C-terminal extension of G domain helix 5, that effectively hides Ras' binding interfaces for many regulator and effector proteins. We suggest that this orientation represents another viable target for turning off Ras signaling by targeted stabilization of membrane adhesion.



## Author Contributions

CN and AEG designed research and wrote the manuscript. CN performed research and analyzed data.

## Acknowledgements

We thank Timothy Travers for providing CHARMM GDP and GTP parameters in GROMACS format, and Priyanka Prakash and Alemayehu A. Gorfe for providing structural models of their OS1 and OS2 states of K-Ras. This work has been supported in part by the JDACS4C program established by the U.S. Department of Energy (DOE) and the National Cancer Institute of the National Institutes of Health. This work was performed under the auspices of the U.S. DOE by Lawrence Livermore National Laboratory under Contract DE-AC52-07NA27344, Los Alamos National Laboratory (LANL) under Contract DE-AC5206NA25396, Oak Ridge National Laboratory under Contract DE-AC05-00OR22725, and Frederick National Laboratory for Cancer Research under Contract HHSN261200800001E. CN held a Director-funded postdoctoral fellowship from LANL. AEG was partially funded by U.S. DOE LDRD funds. Computations used resources provided by the LANL Institutional Computing Program, which is supported by the U.S. DOE National Nuclear Security Administration under Contract No. DE-AC52-06NA25396.

## References

1. Wennerberg, K., K. L. Rossman, and C. J. Der. 2005. The Ras superfamily at a glance. *J. Cell Sci.* 118:843-846.
2. Vetter, I. R., and A. Wittinghofer. 2001. The guanine nucleotide-binding switch in three dimensions. *Science* 294:1299-1304.
3. Fetics, Susan K., H. Guterres, Bradley M. Kearney, G. Buhrman, B. Ma, R. Nussinov, and C. Mattos. 2015. Allosteric effects of the oncogenic RasQ61L mutant on Raf-RBD. *Structure* 23:505-516.
4. Bos, J. L., H. Rehmann, and A. Wittinghofer. 2007. GEFs and GAPs: critical elements in the control of small G proteins. *Cell* 129:865-877.
5. Eva, A., and S. A. Aaronson. 1985. Isolation of a new human oncogene from a diffuse B-cell lymphoma. *Nature* 316:273-275.
6. Trahey, M., and F. McCormick. 1987. A cytoplasmic protein stimulates normal N-ras p21 GTPase, but does not affect oncogenic mutants. *Science* 238:542.
7. Gideon, P., J. John, M. Frech, A. Lautwein, R. Clark, J. E. Scheffler, and A. Wittinghofer. 1992. Mutational and kinetic analyses of the GTPase-activating protein (GAP)-p21 interaction: the C-terminal domain of GAP is not sufficient for full activity. *Mol. Cell. Biol.* 12:2050-2056.
8. Scheffzek, K., M. R. Ahmadian, W. Kabsch, L. Wiesmüller, A. Lautwein, F. Schmitz, and A. Wittinghofer. 1997. The Ras-RasGAP complex: structural basis for GTPase activation and its loss in oncogenic Ras mutants. *Science* 277:333-339.
9. Bonni, A., A. Brunet, A. E. West, S. R. Datta, M. A. Takasu, and M. E. Greenberg. 1999. Cell survival promoted by the Ras-MAPK signaling pathway by transcription-dependent and -independent mechanisms. *Science* 286:1358-1362.
10. Kurada, P., and K. White. 1998. Ras promotes cell survival in *Drosophila* by downregulating hid expression. *Cell* 95:319-329.
11. Halfar, K., C. Rommel, H. Stocker, and E. Hafen. 2001. Ras controls growth, survival and differentiation in the *Drosophila* eye by different thresholds of MAP kinase activity. *Development* 128:1687-1696.
12. Domenico Borasio, G., J. John, A. Wittinghofer, Y.-A. Barde, M. Sendtner, and R. Heumann. 1989. ras p21 protein promotes survival and fiber outgrowth of cultured embryonic neurons. *Neuron* 2:1087-1096.
13. Nobes, C. D., and A. M. Tolkovsky. 1995. Neutralizing anti-p21ras Fabs suppress rat sympathetic neuron survival induced by NGF, LIF, CNTF and cAMP. *Eur. J. Neurosci.* 7:344-350.
14. Campbell, P. M., A. L. Groehler, K. M. Lee, M. M. Ouellette, V. Khazak, and C. J. Der. 2007. K-Ras promotes growth transformation and invasion of immortalized human pancreatic cells by Raf and phosphatidylinositol 3-kinase signaling. *Cancer Res.* 67:2098.
15. Bos, J. L. 1989. Ras oncogenes in human cancer: a review. *Cancer Res.* 49:4682-4689.
16. Adjei, A. A. 2001. Blocking oncogenic ras signaling for cancer therapy. *J. Natl. Cancer Inst.* 93:1062-1074.
17. Karnoub, A. E., and R. A. Weinberg. 2008. Ras oncogenes: split personalities. *Nat. Rev. Mol. Cell Biol.* 9:517-531.

18. Prior, I. A., P. D. Lewis, and C. Mattos. 2012. A comprehensive survey of Ras mutations in cancer. *Cancer Res.* 72:2457-2467.
19. Scheffzek, K., P. Grünewald, S. Wohlgemuth, W. Kabsch, H. Tu, M. Wigler, A. Wittinghofer, and C. Herrmann. 2001. The Ras-Byr2RBD complex: structural basis for Ras effector recognition in yeast. *Structure* 9:1043-1050.
20. Huang, L., F. Hofer, G. S. Martin, and S.-H. Kim. 1998. Structural basis for the interaction of Ras with RalGDS. *Nat. Struct. Mol. Biol.* 5:422-426.
21. Stieglitz, B., C. Bee, D. Schwarz, Ö. Yildiz, A. Moshnikova, A. Khokhlatchev, and C. Herrmann. 2008. Novel type of Ras effector interaction established between tumour suppressor NORE1A and Ras switch II. *EMBO J.* 27:1995.
22. Matsumoto, S., N. Miyano, S. Baba, J. Liao, T. Kawamura, C. Tsuda, A. Takeda, M. Yamamoto, T. Kumasaka, T. Kataoka, and F. Shima. 2016. Molecular mechanism for conformational dynamics of Ras-GTP elucidated from in-situ structural transition in crystal. *Sci. Rep.* 6:25931.
23. Vetter, I. R. 2014. The structure of the G domain of the Ras superfamily. In *Ras superfamily small G proteins: biology and mechanisms 1: General features, signaling*. A. Wittinghofer, editor. Springer Vienna, Vienna. 25-50.
24. Geyer, M., T. Schweins, C. Herrmann, T. Prisner, A. Wittinghofer, and H. R. Kalbitzer. 1996. Conformational transitions in p21ras and in its complexes with the effector protein Raf-RBD and the GTPase activating protein GAP. *Biochemistry* 35:10308-10320.
25. Spoerner, M., C. Herrmann, I. R. Vetter, H. R. Kalbitzer, and A. Wittinghofer. 2001. Dynamic properties of the Ras switch I region and its importance for binding to effectors. *P. Natl. Acad. Sci. USA* 98:4944.
26. Spoerner, M., A. Nuehs, P. Ganser, C. Herrmann, A. Wittinghofer, and H. R. Kalbitzer. 2005. Conformational states of Ras complexed with the GTP analogue GppNHp or GppCH2p: implications for the interaction with effector proteins. *Biochemistry* 44:2225-2236.
27. Spoerner, M., C. Hozsa, J. A. Poetzl, K. Reiss, P. Ganser, M. Geyer, and H. R. Kalbitzer. 2010. Conformational states of human rat sarcoma (Ras) protein complexed with its natural ligand GTP and their role for effector interaction and GTP hydrolysis. *J. Biol. Chem.* 285:39768-39778.
28. Kalbitzer, H. R., M. Spoerner, P. Ganser, C. Hozsa, and W. Kremer. 2009. Fundamental link between folding states and functional states of proteins. *J. Am. Chem. Soc.* 131:16714-16719.
29. Kraulis, P. J., P. J. Domaille, S. L. Campbell-Burk, T. Van Aken, and E. D. Laue. 1994. Solution structure and dynamics of Ras p21-GDP determined by heteronuclear three- and four-dimensional NMR spectroscopy. *Biochemistry* 33:3515-3531.
30. Araki, M., F. Shima, Y. Yoshikawa, S. Muraoka, Y. Ijiri, Y. Nagahara, T. Shirono, T. Kataoka, and A. Tamura. 2011. Solution structure of the state 1 conformer of GTP-bound H-Ras protein and distinct dynamic properties between the state 1 and state 2 conformers. *J. Biol. Chem.* 286:39644-39653.
31. Shima, F., Y. Ijiri, S. Muraoka, J. Liao, M. Ye, M. Araki, K. Matsumoto, N. Yamamoto, T. Sugimoto, Y. Yoshikawa, T. Kumasaka, M. Yamamoto, A. Tamura, and T. Kataoka. 2010. Structural basis for conformational dynamics of GTP-bound Ras protein. *J. Biol. Chem.* 285:22696-22705.

32. Margarit, S. M., H. Sondermann, B. E. Hall, B. Nagar, A. Hoelz, M. Pirruccello, D. Bar-Sagi, and J. Kuriyan. 2003. Structural evidence for feedback activation by Ras·GTP of the Ras-specific nucleotide exchange factor SOS. *Cell* 112:685-695.
33. Willumsen, B. M., A. Christensen, N. L. Hubbert, A. G. Papageorge, and D. R. Lowy. 1984. The p21 ras C-terminus is required for transformation and membrane association. *Nature* 310:583-586.
34. Chiu, V. K., T. Bivona, A. Hach, J. B. Sajous, J. Silletti, H. Wiener, R. L. Johnson, A. D. Cox, and M. R. Philips. 2002. Ras signalling on the endoplasmic reticulum and the Golgi. *Nat. Cell Biol.* 4:343-350.
35. Gorfe, A. A., M. Hanzal-Bayer, D. Abankwa, J. F. Hancock, and J. A. McCammon. 2007. Structure and dynamics of the full-length lipid-modified H-Ras protein in a 1,2-dimyristoylglycero-3-phosphocholine bilayer. *J. Med. Chem.* 50:674-684.
36. Prakash, P., Y. Zhou, H. Liang, J. F. Hancock, and A. A. Gorfe. 2016. Oncogenic K-Ras binds to an anionic membrane in two distinct orientations: a molecular dynamics analysis. *Biophys. J.* 110:1125-1138.
37. Li, Z.-L., and M. Buck. 2017. Computational modeling reveals that signaling lipids modulate the orientation of K-Ras4A at the membrane reflecting protein topology. *Structure* 25:679-689.
38. Prakash, P., and A. A. Gorfe. 2017. Membrane orientation dynamics of lipid-modified small GTPases. *Small GTPases* 8:129-138.
39. Cao, S., S. Chung, S. Kim, Z. Li, D. Manor, and M. Buck. 2019. K-Ras G-domain binding with signaling lipid phosphatidyl inositol (4,5) phosphate (PIP<sub>2</sub>): membrane association, protein orientation and function. *J. Biol. Chem.*
40. Prakash, P., and A. A. Gorfe. 2019. Probing the conformational and energy landscapes of KRAS membrane orientation. *J. Phys. Chem. B.*
41. McLean, M. A., A. G. Stephen, and S. G. Sligar. 2019. PIP<sub>2</sub> influences the conformational dynamics of membrane-bound KRAS4b. *Biochemistry* 58:3537-3545.
42. Abankwa, D., M. Hanzal-Bayer, N. Ariotti, S. J. Plowman, A. A. Gorfe, R. G. Parton, J. A. McCammon, and J. F. Hancock. 2008. A novel switch region regulates H-ras membrane orientation and signal output. *EMBO J.* 27:727-735.
43. Kapoor, S., K. Weise, M. Erklamp, G. Triola, H. Waldmann, and R. Winter. 2012. The role of G-domain orientation and nucleotide state on the Ras isoform-specific membrane interaction. *Eur. Biophys. J.* 41:801-813.
44. Mazhab-Jafari, M. T., C. B. Marshall, M. J. Smith, G. M. C. Gasmi-Seabrook, P. B. Stathopoulos, F. Inagaki, L. E. Kay, B. G. Neel, and M. Ikura. 2015. Oncogenic and RASopathy-associated K-RAS mutations relieve membrane-dependent occlusion of the effector-binding site. *P. Natl. Acad. Sci. USA* 112:6625-6630.
45. Abankwa, D., A. A. Gorfe, K. Inder, and J. F. Hancock. 2010. Ras membrane orientation and nanodomain localization generate isoform diversity. *P. Natl. Acad. Sci. USA* 107:1130.
46. Li, Z.-L., P. Prakash, and M. Buck. 2018. A "tug of war" maintains a dynamic protein-membrane complex: molecular dynamics simulations of C-Raf RBD-CRD bound to K-Ras4B at an anionic membrane. *ACS Cent. Sci.* 4:298-305.
47. Abankwa, D., A. A. Gorfe, and J. F. Hancock. 2008. Mechanisms of Ras membrane organization and signaling: Ras on a rocker. *Cell Cycle* 7:2667-2673.

48. Fang, Z., C. B. Marshall, T. Nishikawa, A. D. Gossert, J. M. Jansen, W. Jahnke, and M. Ikura. 2018. Inhibition of K-RAS4B by a unique mechanism of action: stabilizing membrane-dependent occlusion of the effector-binding site. *Cell Chem. Biol.* 25:1327-1336.
49. Tristram-Nagle, S. 2015. Use of X-ray and neutron scattering methods with volume measurements to determine lipid bilayer structure and number of water molecules/lipid. In *Membrane hydration: the role of water in the structure and function of biological membranes*. E. A. Disalvo, editor. Springer International Publishing, Cham. 17-43.
50. Le Grand, S., A. W. Götz, and R. C. Walker. 2013. SPFP: Speed without compromise—A mixed precision model for GPU accelerated molecular dynamics simulations. *Comput. Phys. Commun.* 184:374-380.
51. Case, D. A., R. M. Betz, D. S. Cerutti, I. Cheatham, T.E. , T. A. Darden, R. E. Duke, T. J. Giese, H. Gohlke, A. W. Goetz, N. Homeyer, S. Izadi, P. Janowski, J. Kaus, A. Kovalenko, T. S. Lee, S. LeGrand, P. Li, C. Lin, T. Luchko, R. Luo, B. Madej, D. Mermelstein, K. M. Merz, G. Monard, H. Nguyen, H. T. Nguyen, I. Omelyan, A. Onufriev, D. R. Roe, A. Roitberg, C. Sagui, C. L. Simmerling, W. M. Botello-Smith, J. Swails, R. C. Walker, J. Wang, R. M. Wolf, X. Wu, L. Xiao, and P. A. Kollman. 2016. AMBER 2016, University of California, San Francisco.
52. Best, R. B., X. Zhu, J. Shim, P. E. M. Lopes, J. Mittal, M. Feig, and A. D. MacKerell. 2012. Optimization of the additive CHARMM all-atom protein force field targeting improved sampling of the backbone  $\phi$ ,  $\psi$  and side-chain  $\chi_1$  and  $\chi_2$  dihedral angles. *J. Chem. Theory Comput.* 8:3257-3273.
53. Klauda, J. B., R. M. Venable, J. A. Freites, J. W. O'Connor, D. J. Tobias, C. Mondragon-Ramirez, I. Vorobyov, A. D. MacKerell, and R. W. Pastor. 2010. Update of the CHARMM all-atom additive force field for lipids: validation on six lipid types. *J. Phys. Chem. B* 114:7830-7843.
54. Neale, C., and A. E. García. 2018. Methionine 170 is an environmentally sensitive membrane anchor in the disordered HVR of K-Ras4B. *J. Phys. Chem. B* 122:10086-10096.
55. Denning, E. J., U. D. Priyakumar, L. Nilsson, and A. D. Mackerell Jr. 2011. Impact of 2'-hydroxyl sampling on the conformational properties of RNA: Update of the CHARMM all-atom additive force field for RNA. *J. Comput. Chem.* 32:1929-1943.
56. MacKerell Jr, A. D., and N. K. Banavali. 2000. All-atom empirical force field for nucleic acids: II. Application to molecular dynamics simulations of DNA and RNA in solution. *J. Comput. Chem.* 21:105-120.
57. Jorgensen, W. L., J. Chandrasekhar, J. D. Madura, R. W. Impey, and M. L. Klein. 1983. Comparison of simple potential functions for simulating liquid water. *J. Chem. Phys.* 79:926-935.
58. MacKerell, A. D., D. Bashford, Bellott, R. L. Dunbrack, J. D. Evanseck, M. J. Field, S. Fischer, J. Gao, H. Guo, S. Ha, D. Joseph-McCarthy, L. Kuchnir, K. Kuczera, F. T. K. Lau, C. Mattos, S. Michnick, T. Ngo, D. T. Nguyen, B. Prodhom, W. E. Reiher, B. Roux, M. Schlenkrich, J. C. Smith, R. Stote, J. Straub, M. Watanabe, J. Wiórkiewicz-Kuczera, D. Yin, and M. Karplus. 1998. All-atom empirical potential for molecular modeling and dynamics studies of proteins. *The Journal of Physical Chemistry B* 102:3586-3616.

59. Abraham, M. J., T. Murtola, R. Schulz, S. Páll, J. C. Smith, B. Hess, and E. Lindahl. 2015. GROMACS: High performance molecular simulations through multi-level parallelism from laptops to supercomputers. *SoftwareX* 1-2:19-25.
60. Miyamoto, S., and P. A. Kollman. 1992. Settle: An analytical version of the SHAKE and RATTLE algorithm for rigid water models. *Journal of Computational Chemistry* 13:952-962.
61. Ryckaert, J.-P., G. Ciccotti, and H. J. C. Berendsen. 1977. Numerical integration of the cartesian equations of motion of a system with constraints: molecular dynamics of n-alkanes. *J. Comput. Phys.* 23:327-341.
62. Huang, J., and A. D. MacKerell. 2013. CHARMM36 all-atom additive protein force field: validation based on comparison to NMR data. *J. Comput. Chem.* 34:2135-2145.
63. Darden, T., D. York, and L. Pedersen. 1993. Particle mesh Ewald: An  $N \cdot \log(N)$  method for Ewald sums in large systems. *The Journal of Chemical Physics* 98:10089-10092
64. Essmann, U., L. Perera, M. L. Berkowitz, T. Darden, H. Lee, and L. G. Pedersen. 1995. A smooth particle mesh Ewald method. *The Journal of Chemical Physics* 103:8577-8593.
65. van Gunsteren, W. F., and H. J. C. Berendsen. 1988. A leap-frog algorithm for stochastic dynamics. *Molecular Simulation* 1:173-185.
66. Hopkins, C. W., S. Le Grand, R. C. Walker, and A. E. Roitberg. 2015. Long-time-step molecular dynamics through hydrogen mass repartitioning. *J. Chem. Theory Comput.* 11:1864-1874.
67. Hunter, J. C., D. Gurbani, S. B. Ficarro, M. A. Carrasco, S. M. Lim, H. G. Choi, T. Xie, J. A. Marto, Z. Chen, N. S. Gray, and K. D. Westover. 2014. In situ selectivity profiling and crystal structure of SML-8-73-1, an active site inhibitor of oncogenic K-Ras G12C. *P. Natl. Acad. Sci. USA* 111:8895-8900.
68. Welsch, M. E., A. Kaplan, J. M. Chambers, M. E. Stokes, P. H. Bos, A. Zask, Y. Zhang, M. Sanchez-Martin, M. A. Badgley, C. S. Huang, T. H. Tran, H. Akkiraju, L. M. Brown, R. Nandakumar, S. Cremers, W. S. Yang, L. Tong, K. P. Olive, A. Ferrando, and B. R. Stockwell. 2017. Multivalent small-molecule pan-RAS inhibitors. *Cell* 168:878-889.e829.
69. Travers, T., C. A. López, Q. N. Van, C. Neale, M. Tonelli, A. G. Stephen, and S. Gnanakaran. 2018. Molecular recognition of RAS/RAF complex at the membrane: role of RAF cysteine-rich domain. *Sci. Rep.* 8:8461.
70. Ostrem, J. M., U. Peters, M. L. Sos, J. A. Wells, and K. M. Shokat. 2013. K-Ras(G12C) inhibitors allosterically control GTP affinity and effector interactions. *Nature* 503:548-551.
71. Lu, S., H. Jang, S. Gu, J. Zhang, and R. Nussinov. 2016. Drugging Ras GTPase: a comprehensive mechanistic and signaling structural view. *Chem. Soc. Rev.* 45:4929-4952.
72. Kabsch, W., and C. Sander. 1983. Dictionary of protein secondary structure: pattern recognition of hydrogen-bonded and geometrical features. *Biopolymers* 22:2577-2637.
73. Patra, M., M. Karttunen, M. T. Hyvönen, E. Falck, and I. Vattulainen. 2004. Lipid bilayers driven to a wrong lane in molecular dynamics simulations by subtle changes in long-range electrostatic interactions. *J. Phys. Chem. B* 108:4485-4494.
74. Vögele, M., and G. Hummer. 2016. Divergent diffusion coefficients in simulations of fluids and lipid membranes. *J. Phys. Chem. B* 120:8722-8732.

75. Klauda, J. B., B. R. Brooks, and R. W. Pastor. 2006. Dynamical motions of lipids and a finite size effect in simulations of bilayers. *J. Chem. Phys.* 125:144710.
76. Camley, B. A., M. G. Lerner, R. W. Pastor, and F. L. H. Brown. 2015. Strong influence of periodic boundary conditions on lateral diffusion in lipid bilayer membranes. *J. Chem. Phys.* 143:243113.
77. Venable, R. M., H. I. Ingólfsson, M. G. Lerner, B. S. Perrin, B. A. Camley, S. J. Marrink, F. L. H. Brown, and R. W. Pastor. 2017. Lipid and peptide diffusion in bilayers: the Saffman–Delbrück model and periodic boundary conditions. *J. Phys. Chem. B* 121:3443-3457.
78. Flyvbjerg, H., and H. G. Petersen. 1989. Error estimates on averages of correlated data. *J. Chem. Phys.* 91:461-466.
79. Chung, J. K., Y. K. Lee, J.-P. Denson, W. K. Gillette, S. Alvarez, A. G. Stephen, and J. T. Groves. 2018. K-Ras4B remains monomeric on membranes over a wide range of surface densities and lipid compositions. *Biophys. J.* 114:137-145.
80. Prakash, P., D. Litwin, H. Liang, S. Sarkar-Banerjee, D. Dolino, Y. Zhou, J. F. Hancock, V. Jayaraman, and A. A. Gorfe. 2019. Dynamics of membrane-bound G12V-KRAS from simulations and single-molecule FRET in native nanodiscs. *Biophys. J.* 116:179-183.
81. Chavan, Tanmay S., H. Jang, L. Khavrutskii, Sherwin J. Abraham, A. Banerjee, Benjamin C. Freed, L. Johannessen, Sergey G. Tarasov, V. Gaponenko, R. Nussinov, and Nadya I. Tarasova. 2015. High-affinity interaction of the K-Ras4B hypervariable region with the Ras active site. *Biophys. J.* 109:2602-2613.
82. Lu, S., A. Banerjee, H. Jang, J. Zhang, V. Gaponenko, and R. Nussinov. 2015. GTP binding and oncogenic mutations may attenuate hypervariable region (HVR)-catalytic domain interactions in small GTPase K-Ras4B, exposing the effector binding site. *J. Biol. Chem.* 290:28887-28900.
83. Lakshman, B., S. Messing, E. M. Schmid, J. D. Clogston, W. K. Gillette, D. Esposito, B. Kessing, D. A. Fletcher, D. V. Nissley, F. McCormick, A. G. Stephen, and F. L. Jean-Francois. 2018. Quantitative biophysical analysis defines key components modulating recruitment of the GTPase KRAS to the plasma membrane. *J. Biol. Chem.*
84. Cruz-Migoni, A., P. Canning, C. E. Quevedo, C. J. R. Bataille, N. Bery, A. Miller, A. J. Russell, S. E. V. Phillips, S. B. Carr, and T. H. Rabbitts. 2019. Structure-based development of new RAS-effector inhibitors from a combination of active and inactive RAS-binding compounds. *P. Natl. Acad. Sci. USA* 116:2545-2550.
85. Maurer, T., L. S. Garrenton, A. Oh, K. Pitts, D. J. Anderson, N. J. Skelton, B. P. Fauber, B. Pan, S. Malek, D. Stokoe, M. J. C. Ludlam, K. K. Bowman, J. Wu, A. M. Giannetti, M. A. Starovasnik, I. Mellman, P. K. Jackson, J. Rudolph, W. Wang, and G. Fang. 2012. Small-molecule ligands bind to a distinct pocket in Ras and inhibit SOS-mediated nucleotide exchange activity. *P. Natl. Acad. Sci. USA* 109:5299-5304.
86. Dharmiah, S., L. Bindu, T. H. Tran, W. K. Gillette, P. H. Frank, R. Ghirlando, D. V. Nissley, D. Esposito, F. McCormick, A. G. Stephen, and D. K. Simanshu. 2016. Structural basis of recognition of farnesylated and methylated KRAS4b by PDE $\delta$ . *P. Natl. Acad. Sci. USA* 113:E6766-E6775.
87. Bunney, T. D., R. Harris, N. L. Gandarillas, M. B. Josephs, S. M. Roe, S. C. Sorli, H. F. Paterson, F. Rodrigues-Lima, D. Esposito, C. P. Ponting, P. Gierschik, L. H. Pearl, P. C. Driscoll, and M. Katan. 2006. Structural and mechanistic insights into Ras association domains of phospholipase C epsilon. *Mol. Cell* 21:495-507.

88. Qamra, R., and S. R. Hubbard. 2013. Structural basis for the interaction of the adaptor protein Grb14 with activated Ras. *PLoS ONE* 8:e72473.
89. Pacold, M. E., S. Suire, O. Perisic, S. Lara-Gonzalez, C. T. Davis, E. H. Walker, P. T. Hawkins, L. Stephens, J. F. Eccleston, and R. L. Williams. 2000. Crystal structure and functional analysis of Ras binding to its effector phosphoinositide 3-kinase gamma. *Cell* 103:931-944.
90. Aramini, James M., Sergey M. Vorobiev, Lynda M. Tuberty, H. Janjua, Elliot T. Campbell, J. Seetharaman, M. Su, Yuanpeng J. Huang, Thomas B. Acton, R. Xiao, L. Tong, and Gaetano T. Montelione. 2015. The RAS-binding domain of human BRAF protein serine/threonine kinase exhibits allosteric conformational changes upon binding HRAS. *Structure* 23:1382-1393.
